# Supplementary material for: Proto-oncogenic isoform A2 of eukaryotic translation elongation factor eEF1 is a target of miR-663 and miR-744
Source: PubMed Central journal article supplement — Br J Cancer. 2013 May 21;108(11):2304–11. doi: 10.1038/bjc.2013.243 (PMC3681015; doi:10.1038/bjc.2013.243), 2013-05-21
Supplement: bjc2013243x1.pdf [file bjc2013243x1.pdf]

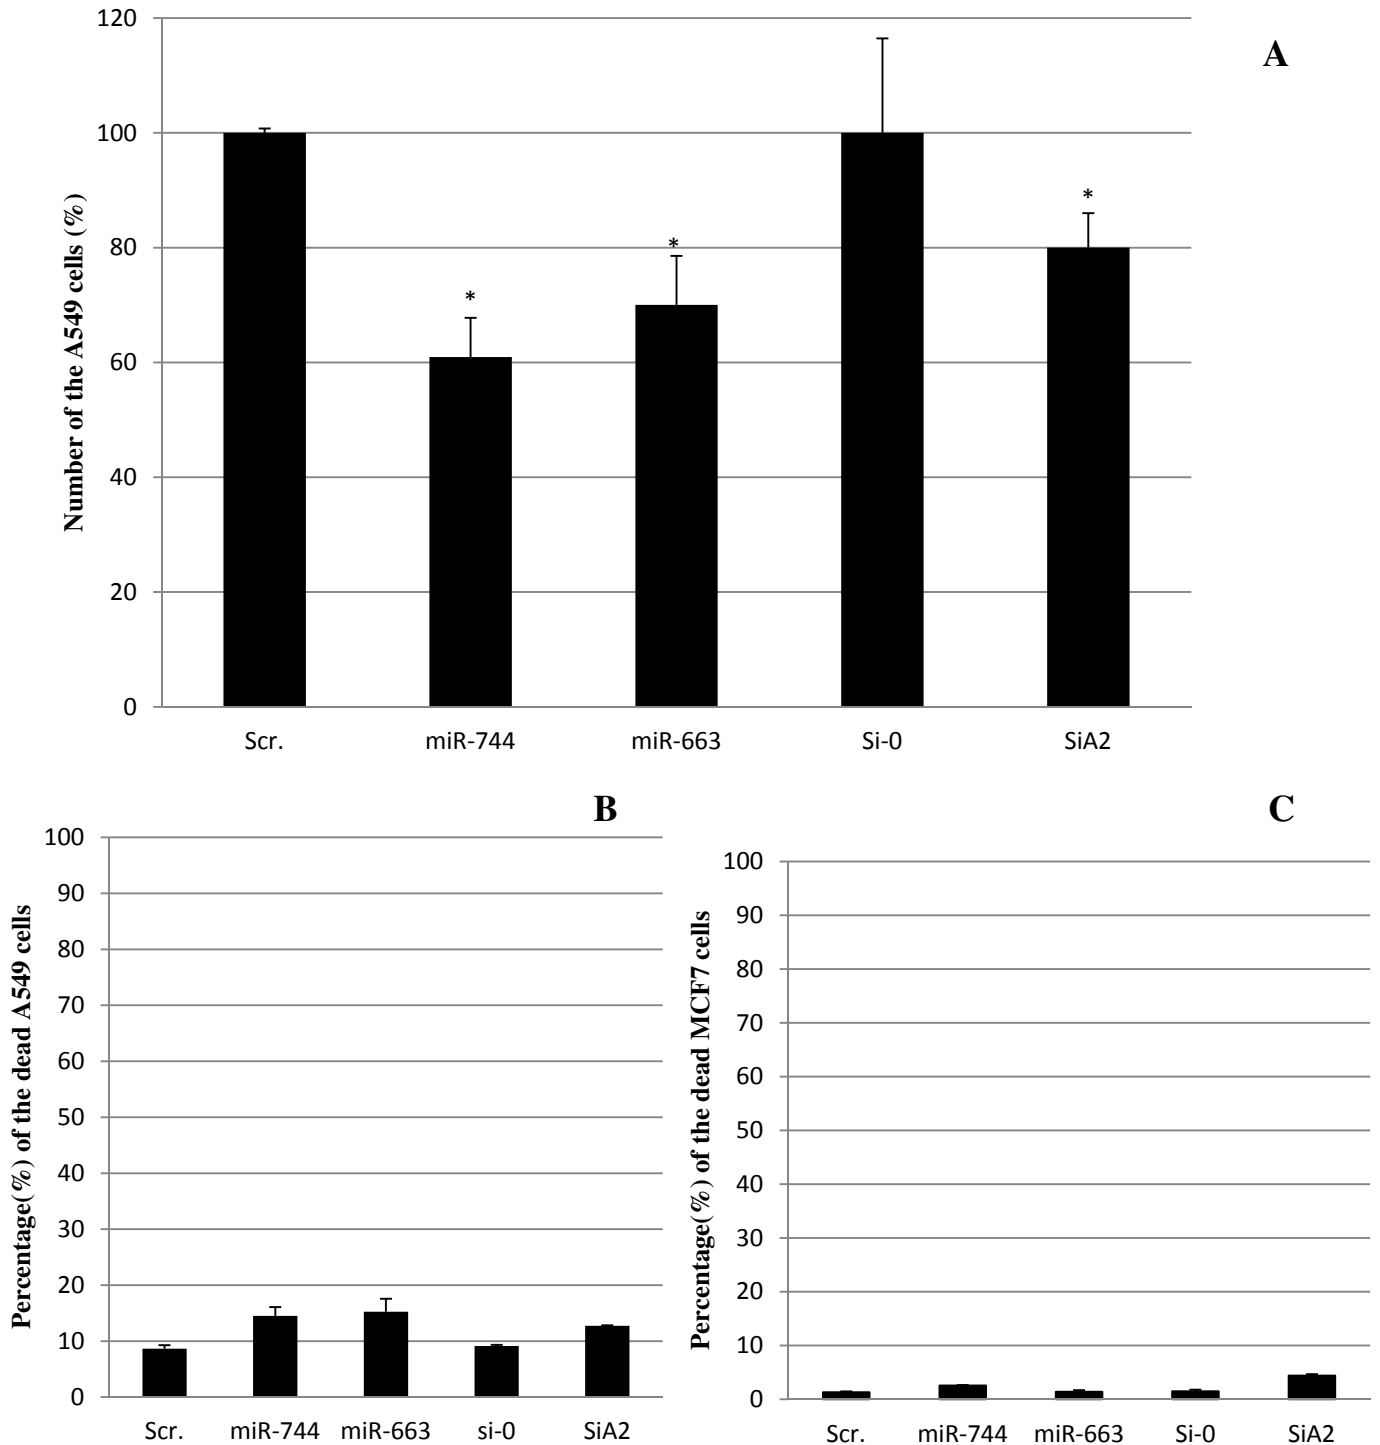

**Supplementary figure 1. Effect of miRNA-mediated eEF1A2 downregulation on cell death and proliferation.** (A) A549 cells were treated with mir-663, mir-744 precursor, or siRNA against eEF1A2. After 72h the cells were fixed, stained and counted. To calculate amount of the dead cells, before fixation step A549 cells (B) or MCF7 cells (C) were stained with propidium iodide. Cells were counted using the OPERETTA High Content Imaging System. Transfections of scrambled miRNA precursor (Scr.) or no-target siRNA (Si-0) were used as controls. Error bars represent SDs. \* $P < 0.05$  vs. control.  $n = 3$ . Student's  $t$  test.
