# Supplementary material for: Proto-oncogenic isoform A2 of eukaryotic translation elongation factor eEF1 is a target of miR-663 and miR-744
Source: PubMed Central journal article supplement — Br J Cancer. 2013 May 21;108(11):2304–11. doi: 10.1038/bjc.2013.243 (PMC3681015; doi:10.1038/bjc.2013.243), 2013-05-21
Supplement: bjc2013243x2.pdf [file bjc2013243x2.pdf]

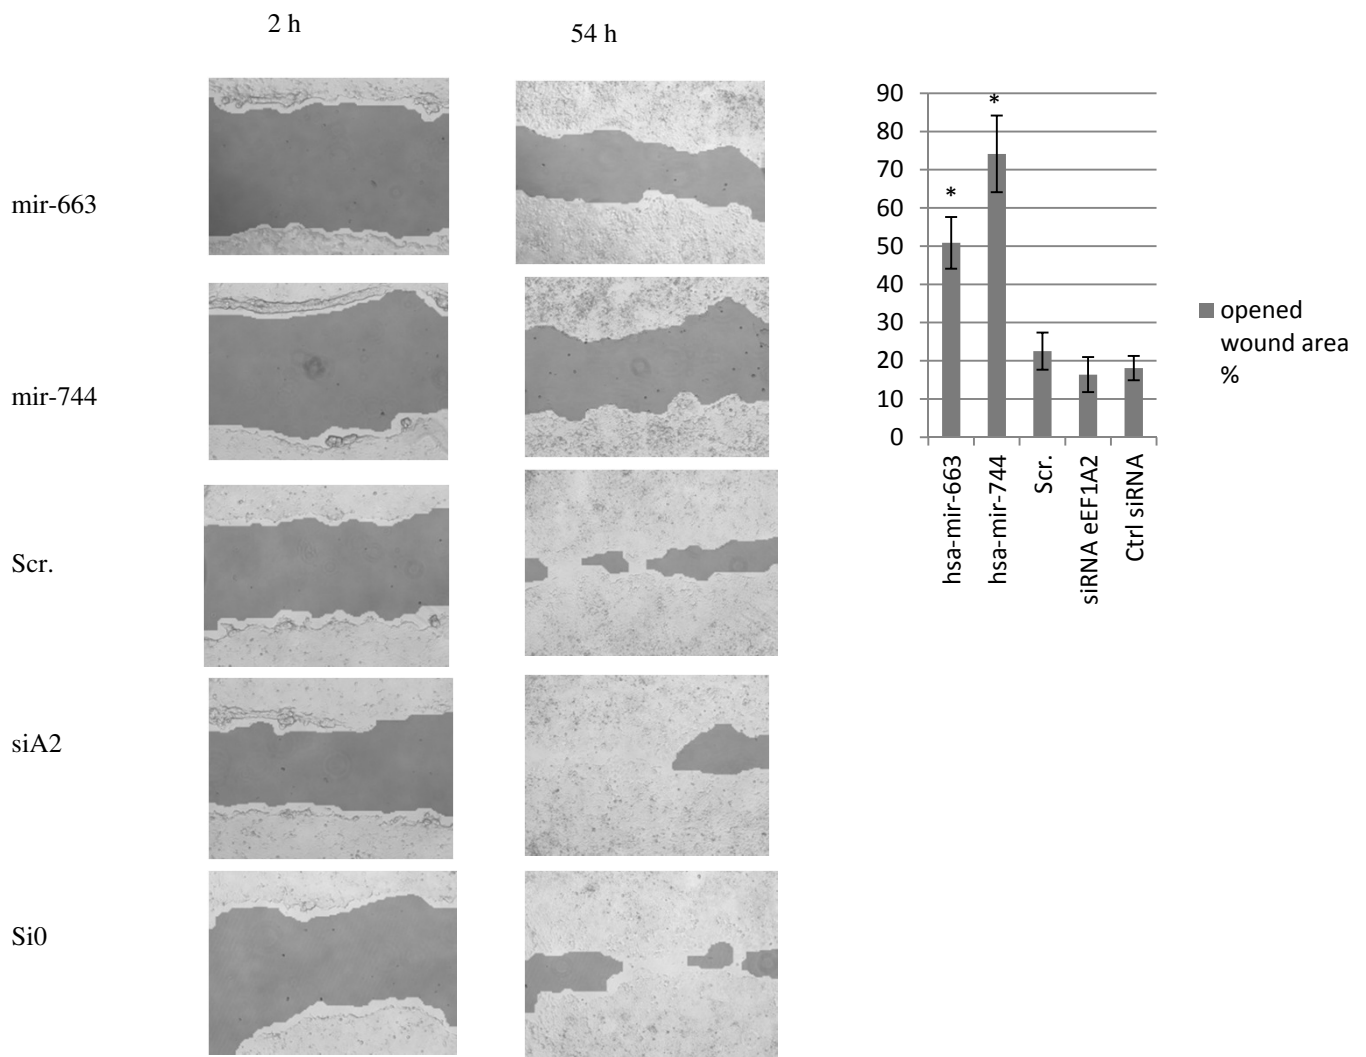

**Supplementary figure 2.** Effect of miRNA-mediated eEF1A2 downregulation on MCF7 cell migration measured in the wound healing assay (54 hours after transfection). MCF7 cells were transfected with either mir-663, mir-744 precursor, or siRNA against eEF1A2. Scrambled miRNA precursor or no-target siRNA were used as controls. Error bars represent SDs. \* $P < 0.05$  vs. control.  $n = 3$ . Student's  $t$  test.
